# Supplementary material
Source: Royal Society of Chemistry journal article supplement (doi:10.1039/d6cp00342g)
Supplement: d6cp00342g1.pdf [file d6cp00342g1.pdf]

Supporting Information

## Competitive adsorption and threading behavior in cyclic-linear polymer blend films supported on an attractive substrate

Zhunpeng Wang, Luna Ye, Jianhua Huang\*

*Department of Chemistry, Zhejiang Sci-Tech University, Hangzhou 310018, China*

\*Corresponding author: jhhuang@zstu.edu.cn

### 1. Conformations and dynamics of flexible cyclic polymers in the melts

We have simulated the dependence of conformations and dynamics on polymer length  $N$  for flexible cyclic polymers in a melt at temperature  $T = 1$ . The density is set as 0.8. As shown in Fig. S1(a), the mean square radius of gyration exhibits the relation  $\langle R_g^2 \rangle \sim (N-1)^{2\nu}$  with  $\nu = 0.53$  and  $0.47$  for linear and cyclic polymers, respectively. The exponent  $\nu$  values are consistent with those reported in the previous literature.<sup>1</sup> And the small  $\nu$  value for the cyclic polymer manifests that topological constraint leads to more compact structures for cyclic polymers compared to linear analogues.<sup>1,2</sup>

For the dynamics of flexible cyclic polymers in the melt, we have calculated the mean square displacement of the center-of-mass of the cyclic polymers for a sufficiently long time starting from the equilibrium conformations:  $\langle \Delta r^2(t) \rangle = \langle [\mathbf{r}_{\text{cm}}(t) - \mathbf{r}_{\text{cm}}(0)]^2 \rangle$ , and  $\mathbf{r}_{\text{cm}}(t)$  and  $\mathbf{r}_{\text{cm}}(0)$  is the position vector of the center-of-mass of the cyclic polymers at time  $t$  and at initial time  $t = 0$ , respectively. As an example, the inset in Fig. S1(b) presents the evolution of  $\langle \Delta r^2 \rangle$  of the flexible cyclic polymer of length  $N = 32$  at temperature  $T = 1$ . Clearly,  $\langle \Delta r^2 \rangle$  increases linearly with time  $t$  at a long time scale.

Then the diffusion coefficient  $D = \lim_{t \rightarrow \infty} \frac{\langle \Delta r^2(t) \rangle}{6t}$  can be obtained through a linear fitting in the long-time regime.

Fig. S1(b) presents the variation of  $D$  with  $N$  for the cyclic polymers. As the polymer length increases from 8 to 96, we observe a transition in the scaling behavior from  $D \sim N^{-1}$  to  $D \sim N^{-1.3}$ . This transition is consistent with the previous MD simulation results for polyethylene (PE) melts.<sup>1</sup> And the deviation from the Rouse model for long  $N$  may be due to the threading between cyclic polymers.<sup>1,2</sup>

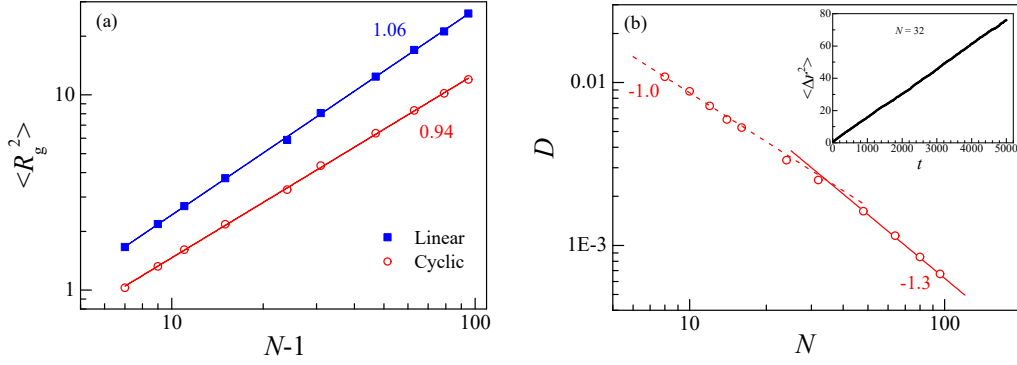

**Fig. S1** (a) Log-log plot of the mean square radius of gyration  $\langle R_g^2 \rangle$  versus the chain length,  $N-1$ , for flexible cyclic (open circles) and linear (solid squares) polymers in melts; (b) Log-log plot of the center-of-mass diffusion constant  $D$  versus the total number of monomers in the chain,  $N$ , for flexible cyclic polymers in melts. The straight solid lines in (a) are linear fitting results of  $\langle R_g^2 \rangle \sim (N-1)^{2\nu}$  with  $\nu = 0.53$  and  $0.47$  for linear and cyclic polymers, respectively. The dash and solid lines in (b) are  $D \sim N^{-1}$  for short cyclic chains and  $D \sim N^{-1.3}$  for long ones, respectively. Inset in (b): Plot of the mean square displacement  $\langle \Delta r^2 \rangle$  versus time  $t$  for the flexible cyclic polymers of length  $N = 32$ . The concentration  $c_p = 0.8$ , and temperature  $T = 1$ .

## 2. Effect of topological structure on the diffusion of polymers.

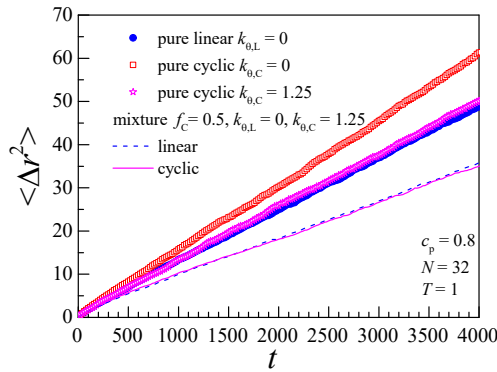

**Fig. S2** Mean square displacement ( $\langle \Delta r^2 \rangle$ ) of the center-of-mass of polymers in the bulk region of pure cyclic and pure linear polymer film, and a blend film of the fraction of cyclic chains  $f_C = 0.5$ . Chain length  $N = 32$ , the stiffness of linear chains  $k_{0,L} = 0$ , the stiffness of cyclic chains  $k_{0,C} = 0$  and  $1.25$ , temperature  $T = 1$ .

### 3. Effect of the fraction of cyclic chains in cyclic-linear polymer blend films.

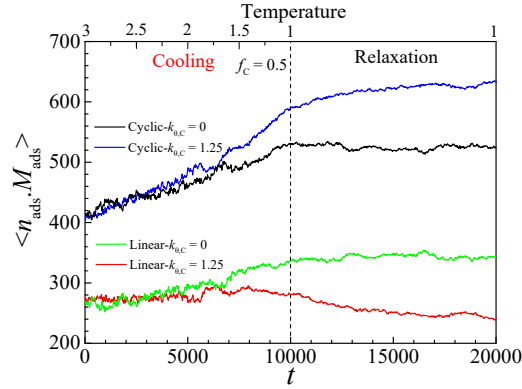

**Fig. S3** Evolution of the number of adsorbed monomers ( $\langle n_{\text{ads}} \cdot M_{\text{ads}} \rangle$ ) for cyclic and linear chains in the blend film of the fraction of cyclic chains  $f_C = 0.5$ , when the equilibrated film at  $T = 3$  is linearly cooled down to  $T = 1$ , followed by subsequent relaxation at  $T = 1$  for the stiffness of cyclic chains  $k_{\theta,C} = 0$  and 1.25. The stiffness of linear chains  $k_{\theta,L} = 0$ .

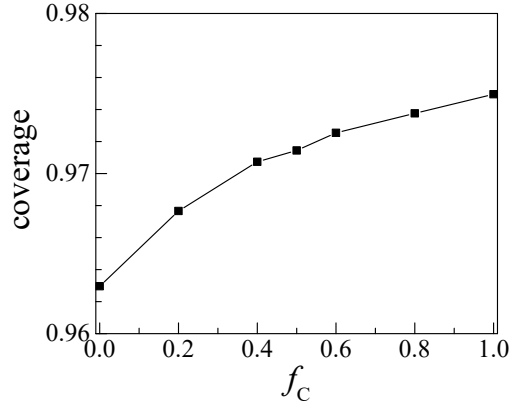

**Fig. S4** Variation of the coverage of substrate surface, defined as the number of adsorbed monomers per substrate area, with the fraction of cyclic chains  $f_C$  in cyclic-linear polymer blend films. Chain length  $N = 32$ , the stiffness of cyclic and linear chains  $k_{\theta,C} = 1.25$  and  $k_{\theta,L} = 0$ , respectively, temperature  $T = 1$ .

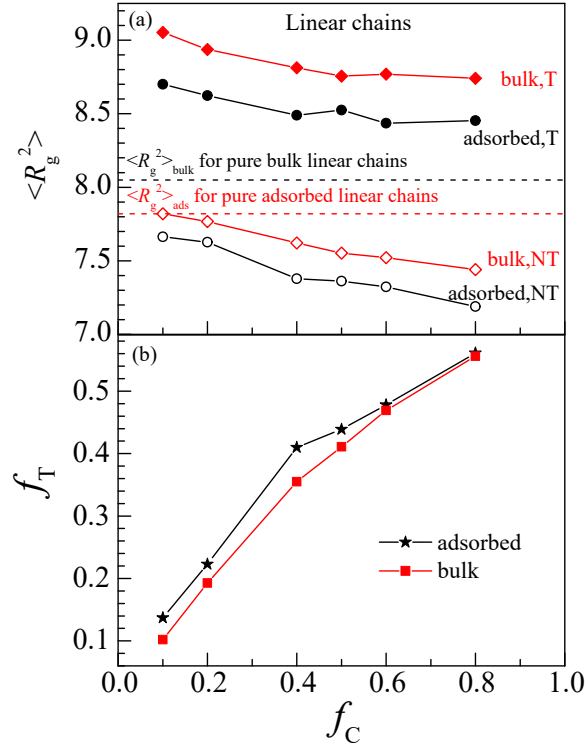

**Fig. S5** Variations of the mean square radius of gyration  $\langle R_g^2 \rangle$  of threading and non-threading linear chains (a) and the fraction of linear chains threading through cyclic chains  $f_T$  (b) on the fraction of cyclic chains  $f_c$  in cyclic-linear polymer blend films. Chain length  $N = 32$ , the stiffness of cyclic and linear chains  $k_{0,C} = 1.25$  and  $k_{0,L} = 0$ , respectively, temperature  $T = 1$ .

#### 4. Effect of the stiffness of cyclic chains in the cyclic-linear polymer blend film.

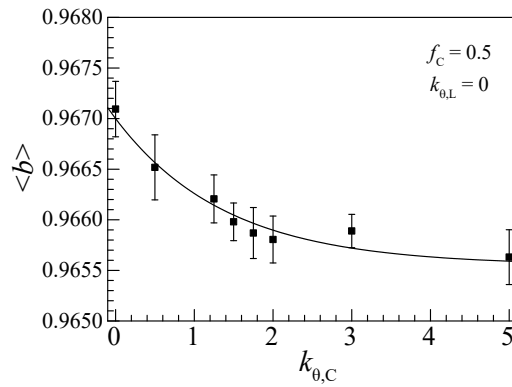

**Fig. S6** Effect of the stiffness of cyclic chains ( $k_{0,C}$ ) on the mean bond length ( $\langle b \rangle$ ) of cyclic chains in the blend film of  $f_c = 0.5$ . The solid line is a guide to the eye. The stiffness of linear chains  $k_{0,L} = 0$ , temperature  $T = 1$ .

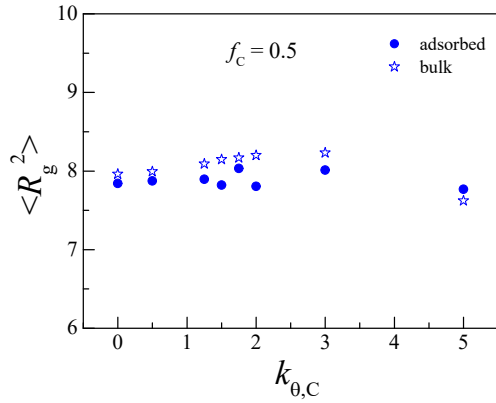

**Fig. S7** Plot of the mean square radius of gyration  $\langle R_g^2 \rangle$  of adsorbed and bulk linear chains versus the stiffness of cyclic chains  $k_{0,C}$  in the cyclic-linear polymer blend films of  $f_C = 0.5$ . The stiffness of linear chains  $k_{0,L} = 0$ , chain length  $N = 32$ , temperature  $T = 1$ .

**Table S1** Mean square radius of gyration of cyclic polymers adsorbed onto the substrate ( $\langle R_g^2 \rangle_{\text{ads}}$ ) and in the bulk region ( $\langle R_g^2 \rangle_{\text{bulk}}$ ) in cyclic-linear polymer blend film of  $f_C = 0.5$  and in pure cyclic polymer film ( $f_C = 1$ ) for different stiffness  $k_{0,C}$  of cyclic polymer.

| $k_{0,C}$ | $\langle R_g^2 \rangle_{\text{ads}}$ |           | $\langle R_g^2 \rangle_{\text{bulk}}$ |           |
|-----------|--------------------------------------|-----------|---------------------------------------|-----------|
|           | $f_C = 0.5$                          | $f_C = 1$ | $f_C = 0.5$                           | $f_C = 1$ |
| 0         | 4.37                                 | 4.27      | 4.42                                  | 4.29      |
| 0.5       | 5.07                                 | 4.92      | 5.01                                  | 4.84      |
| 1.25      | 7.17                                 | 6.86      | 6.47                                  | 6.18      |
| 1.5       | 8.42                                 | 7.95      | 7.12                                  | 6.80      |
| 1.75      | 11.28                                | 9.86      | 7.82                                  | 7.42      |
| 2         | 14.34                                | 13.58     | 8.53                                  | 8.14      |
| 3         | 16.58                                | 15.56     | 11.62                                 | 11.50     |
| 5         | 18.02                                | 17.62     | 18.13                                 | 17.93     |

## References

1. K. Hur, R. G. Winkler and D. Y. Yoon, Comparison of ring and linear polyethylene from molecular dynamics simulations, *Macromolecules*, 2006, **39**, 3975–3977.
2. Y. Li, P. Yao and H. Guo, Non-Rouse behavior of short ring polymers in melts by molecular dynamics simulations, *Soft Matter*, 2023, **19**, 7161–7171.
